1  
2  
3  
4  
5  
6  
7  
8  
9  
10  
11  
12  
13  
14  
15  
16  
17  
18  
19  
20  
21  
22  
23  
24  
25

Grain aphids (*Sitobion avenae*) with knockdown resistance (kdr) to insecticide exhibit fitness trade-offs, including increased vulnerability to the natural enemy *Aphidius ervi*.

**Damon Little<sup>1</sup>, Gaynor Malloch<sup>2</sup>, Louise McNamara<sup>3</sup>, Gail E. Jackson<sup>1\*</sup>**

<sup>1</sup>The School of GeoSciences, University of Edinburgh, Crew Building, King's Buildings, Alexander Crum Brown Road, Edinburgh, Scotland, UK, EH9 3FF

<sup>2</sup>The James Hutton Institute, Invergowrie, Dundee, Scotland, UK, DD2 5DA

<sup>3</sup>Teagasc, Crops Research Centre, Oak Park, Carlow, Ireland

**\*Corresponding author**

**Email: [G.Jackson@ed.ac.uk](mailto:G.Jackson@ed.ac.uk)**

27 **Abstract**

28 The development of insecticide-resistance mechanisms in aphids has been associated with  
29 inhibitory, pleiotropic fitness costs. Such fitness costs have not yet been examined in the UK's  
30 most damaging cereal aphid, *Sitobion avenae* (grain aphid) (Hemiptera: Aphididae). This study  
31 aimed to evaluate the fitness trade-offs of the insecticide-resistant *S. avenae* clone versus an  
32 insecticide-susceptible *S. avenae* clone. Additionally, the parasitoid, *Aphidius ervi*  
33 (Hymenoptera: Braconidae), was introduced to examine its potential as a biological control  
34 agent. This study found that insecticide-resistant clones had significantly lower population  
35 growth and individual relative growth rate. Furthermore, insecticide-resistant clones suffered  
36 from a significantly greater rate of parasitisation (mummification) compared to their insecticide-  
37 susceptible counterparts. The successfulness of the parasitoid as a biological control agent could  
38 prevent the spread of the insecticide-resistant genotype. However, for this to be possible,  
39 insecticide spraying regimes need to be moderated, and habitat modification and parasitoid  
40 manipulation must be considered.

41

## 42 **Introduction**

43 The evolution of organisms occurs via genetic variation and selection imposed by many abiotic  
44 and biotic environmental factors. Each factor can exert an opposing selection pressure, resulting  
45 in the variation of optimal levels of defence or immunity depending on the environmental  
46 conditions. The establishment of trade-offs occur when opposing selection pressures cause the  
47 defence/immunity level to be lower than the maximum (Boivin *et al.*, 2003). In areas where  
48 selection pressures vary over time, the balance between trade-offs can shift, which may lead to  
49 the optimal defence/immunity level changing. Environmental fluctuations can lead to organisms  
50 mutating to better suit their new environment; however, these mutations can be limited if they  
51 incur pleiotropic fitness costs which affect physiological or behavioural traits (Boivin *et al.*,  
52 2003).

53 In response to strong, unambiguous selection pressures caused by intense, widespread  
54 agricultural activity, some pests have developed adaptive traits including pesticide resistance. A  
55 mechanism known as ‘knockdown resistance’ (kdr) has allowed cross-resistance in pests to DDT  
56 and pyrethroids. This mechanism is characterised by a reduction in the sensitivity of the nervous  
57 system caused by a single amino acid substitution (L1014F) in the insect’s voltage gated sodium  
58 channel gene (Sawicki, 1985; Foster *et al.* 2014). Intuitively, kdr resistant individuals should  
59 experience fitness costs in areas where there is no insecticide pressure compared to susceptible  
60 ones. If this was not the case, the frequency of resistant alleles would be higher prior to exposure  
61 to pesticides (Crow, 1957). Therefore, the resistant genes are likely to have deleterious  
62 pleiotropic costs, which have constrained the adaptive trait (Roush and McKenzie, 1987). In  
63 support of this theory, there is growing evidence detailing the maladaptive side-effects of fitness  
64 changes on other seemingly unrelated traits (Foster *et al.* 2003; Foster *et al.* 2007).

65 During the late summer of 2011, growers in England began reporting that *Sitobion avenae* (grain  
66 aphid) (Hemiptera: Aphididae) were becoming less susceptible to pyrethroids sprayed on cereal

67 crops. *S. avenae* is one of the most damaging cereal aphids in Western Europe, feeding on all  
68 cereals including barley, wheat and rice (Van Emden and Harrington, 2017). *S. avenae* show a  
69 strong preference for the ear of cereals, which generally stay physiologically active for longer  
70 than the leaf. This allows *S. avenae* to maintain itself for considerably longer than other aphid  
71 species (Dean and Luuring, 1970). Foster *et al.* (2014) identified that the *kdr* mechanism had  
72 resulted in clonal variation in the *S. avenae* sample with resistant clones exhibiting a 40-fold  
73 Resistance Factor. Currently, most studies investigating fitness trade-offs caused by insecticide-  
74 resistance have involved *Myzus persicae* (peach-potato aphid). There are no studies into the  
75 effect of the *kdr* mechanism on *S. avenae* and the maladaptive fitness traits that may be incurred.  
76 Existing literature suggests that the *kdr*-resistant *S. avenae* clone may have invested in the *kdr*  
77 mutation at the cost of pleiotropic performance traits. Malloch *et al.* (2016) show that the  
78 frequency of the *kdr* resistant *Sitobion avenae* clone in UK suction trap catches has stabilised at  
79 around 30%, which provides further evidence for the likelihood of some fitness costs associated  
80 with the *kdr* mutation. Currently the *kdr* mechanism is heterozygous (*kdr*-SR), but if  
81 homozygous resistance (*kdr*-RR) were to evolve, the levels of resistance would be expected to  
82 further increase (Foster *et al.* 2014).

83 With increased resistance to pesticides, it has become imperative to develop other pest  
84 management techniques, such as, exploiting and manipulating the natural enemies of pests to act  
85 as a biological control (Huffaker, 2012). The use of natural enemies to suppress specific pest  
86 organisms has evolved into an important facet of integrated pest management (IPM) (e.g.  
87 Hunter, 1909, Room *et al.* 1981). The effectiveness of natural enemies as a biological control  
88 depends on several characteristics. These include high reproductive potential, a short  
89 development time in relation to prey and a high level of prey specificity (Debach and Rosen,  
90 1991). Such characteristics are exemplified in the parasitoid Diptera and Hymenoptera. Adult  
91 females belonging to these orders are generally highly fecund, develop inside their prey making  
92 generation time similar to that of the host and only specialise in attacking a small number of prey

93 species (Debach and Rosen, 1991). With over 400 species recorded (Starý *et al.* 1988), the use of  
94 aphid-specific parasitoids (Hymenoptera: Braconidae) in controlling aphid populations has been  
95 well documented in various cropping systems (Chambers *et al.* 1986; Starý *et al.* 1988). *Aphidius*  
96 *ervi*, used in this study is a solitary endophagous parasitoid, with an overall time from  
97 oviposition to wasp emergence of  $14 \pm 3$  days (Thiboldeaux, 1986; Ives *et al.* 1999). To locate  
98 hosts, *A. ervi* use chemical cues such as aggregation and sex pheromones, and plant volatiles  
99 (Godfray, 1994). After locating the aphid, female *A. ervi* rapidly attempt to parasitise it by  
100 penetrating its exoskeleton with an ovipositor (Starý, 1988).

101 The present study was designed to determine if the *kdr*-resistant *S. avenae* clone has developed  
102 any maladaptive behavioural or physiological characteristics because of the *kdr* mechanism. The  
103 study compared and assessed differences in performance traits in the *kdr*-resistant and *kdr*-  
104 susceptible clones. It was hypothesised that the *kdr*-susceptible clones would have a significantly  
105 greater aphid population growth rate and individual relative growth rate than the *kdr*-resistant  
106 clones. Additionally, following the introduction of the parasitoid, *Aphidius ervi* (Hymenoptera:  
107 Braconidae), it was hypothesised that the *kdr*-susceptible clone would be able to deter the  
108 parasitic wasp more successfully than the *kdr*-resistant clone. Furthermore, it was hypothesised  
109 that in comparison with the *kdr*-susceptible clone, a greater proportion of *kdr*-resistant clone  
110 would be parasitised, and the parasitoid emergence rate would be greater in the *kdr*-resistant  
111 colonies.

## 112 **Materials and Methods**

### 113 **Study Species**

114 Barley (*Hordeum vulgare* cv. Sienna) was used as the host plant. Four barley seeds were planted  
115 in to each of 24 2 L pots containing Levington M3 High Nutrient Compost (Everris, Ipswich,  
116 UK). Plants were grown in a glasshouse at  $21 \pm 2$  °C, under a 16:8 light:dark photoperiod and  
117 watered twice weekly throughout the study. After 21 days plants were thinned to leave one plant

118 per pot, which were grown on for a further 40 days until they reached GS23 (AHDB Cereal  
119 growth stages).

120 Two clonal lines of the grain aphid, *Sitobion avenae*, were sourced from long-term colonies  
121 reared by the James Hutton Institute in Dundee: (1) homozygous fully insecticide susceptible of  
122 SA12A lineage (kdr-SS) and (2) kdr heterozygous insecticide resistant of SA3 lineage (kdr-SR).  
123 Aphid colonies were reared on three barley plants in separate mesh cages (50 cm by 50 cm by 50  
124 cm) in an insectary ( $17 \pm 3$  °C;  $65 \pm 5$  % RH; LD 16:8 h,  $150 \mu\text{mol m}^{-2} \text{s}^{-1}$ ). Plants were  
125 replenished each week. Clonal integrity was verified at the beginning and end of the experiment  
126 through DNA genotyping. DNA was extracted from single adult *S. avenae* using a sodium  
127 hydroxide method described in Malloch et al. (2006). Five microsatellite loci were examined:  
128 Sm10, Sm12, Sm17, SaΣ4, and S16b using published primer pair sequences (Simon et al. 1999,  
129 Wilson et al. 2004). PCR was carried out in 8  $\mu\text{l}$  volumes using Illustra™ Ready to Go PCR  
130 beads (GE Healthcare). When the bead is reconstituted the concentration of each dNTP is 200  
131  $\mu\text{M}$  in 10 mM Tris HCl, 50 mM KCl and 1.5 mM  $\text{MgCl}_2$ . Each bead contains 2.5 units of Taq  
132 polymerase. PCR was carried out on a Techne 5 Prime /02 thermal cycler using the Touchdown  
133 programme described in Sloane et al. (2001). Genotyping was carried out on an ABI 3730 DNA  
134 analyser and the results interpreted using GeneMapper software (Applied Biosystems 2005).  
135 Genotypes were assigned using a reference data set for the SA12A and SA3 colonies held at the  
136 James Hutton Institute.

137 The aphid parasitoid *Aphidius ervi*, was acquired as mummies (Fargro Ltd., West Sussex) and  
138 used immediately upon receipt.

### 139 **Experimental Setup**

140 The experiment was conducted in Scotland's Rural College (SRUC) insectary ( $17 \pm 3$  °C;  $65 \pm 5$   
141 % RH; LD 16:8 h,  $150 \mu\text{mol m}^{-2} \text{s}^{-1}$ ) at the King's Buildings campus at the University of  
142 Edinburgh between the 11<sup>th</sup> February 2019 and the 5<sup>th</sup> April 2019.

143 61 days after planting (at GS23), 24 barley plants were randomly assigned to eight mesh  
144 chambers (50 cm by 50 cm by 50 cm), with three plants per chamber. The kdr-SS and kdr-SR  
145 clones were randomly allocated to each chamber so that there were four chambers of each  
146 genotype. Each plant was inoculated with six apterous adult aphids. They were distributed  
147 evenly between the first and second longest tiller of the plant (three aphids per tiller).

## 148 **Aphid Performance Traits**

### 149 *Tiller-level aphid abundance*

150 Aphid counts were conducted twice a week for five weeks on the first and second longest tiller  
151 of each plant. All aphids from the base of the tiller to the ear were counted. This acted as a proxy  
152 of aphid population growth.

### 153 *Aphid Relative Growth Rate (RGR)*

154 RGR was calculated for one aphid per plant. A clip cage (Noble, 1958) was placed over a  
155 healthy apterous adult aphid. After 24 h the clip cage was removed and the adult aphid and all  
156 but one of the nymphs were removed. The clip cage was then replaced over the nymph, and after  
157 a further 48 hours, it was weighed using a Mettler Toledo XP6 Analytical Balance (Mettler  
158 Toledo Ltd., Leicester, UK). After weighing, it was transferred back to the barley leaf and  
159 covered by the clip cage again. Exactly 72 h later, the nymph was reweighed, and RGR  
160 calculated using van Emden and Bashford's (1969) formula:

$$161 \quad \text{RGR} = \frac{[\ln(\text{Final Weight}) - \ln(\text{Initial Weight})]}{[\text{Growth Period (days)}]}$$

162 The RGR values were then averaged for each genotype to create a Mean Relative Growth Rate  
163 (MRGR). On the occasion that the aphid final weight was less than the initial weight, the data  
164 were discarded due to the assumption that the aphid had been damaged (Jackson, 1995).

### 165 *Parasitoid-aphid interactions*

166 Aphid behaviour responses initiated by parasitoid wasps were observed under a binocular  
167 microscope. A 5 cm length of barley leaf with one apterous adult aphid attached was placed  
168 inside a Perspex petri dish along with one female wasp. Following first physical contact between  
169 the aphid and wasp, aphid behavioural responses were recorded for one minute. First contact  
170 occurred when the parasitoid walked over the aphid, or touched it with its ovipositor or antennae  
171 (Foster *et al.* 2007). During this time, the ‘warding behaviour’ recorded as the number of kicks  
172 and drops were counted. A kick was defined as the aphid moving its body vigorously whilst  
173 kicking its hind legs in the direction of the wasp (Dixon, 1988). A drop was recorded when the  
174 aphid did a short jump away from the feeding site and the wasp. This normally resulted in the  
175 aphid detaching itself from the leaf (Villagra *et al.* 2002). A new wasp, aphid, barley leaf and  
176 Perspex petri dish was used for each observation to avoid pseudoreplication.

#### 177 *Mummification of Sitobion avenae clones*

178 Thirty one days after aphids were placed on the experimental plants (92 days after planting),  
179 thirty-five *A. ervi* wasp mummies were placed into each of eight Perspex petri dishes, one of  
180 which was added to the centre of each chamber. The emergent wasps were left in the chambers  
181 for 21 days to parasitise the aphids. Each barley plant was then harvested along with its aphid  
182 population, and the number of new mummies per plant counted, removed and placed into sealed  
183 petri dishes. Each plant was then bagged and placed into a freezer (-20 °C) for three days. The  
184 number of aphids per plant was then counted and the proportion of mummified aphids to the  
185 total number of aphids calculated for each plant.

#### 186 *Aphidius ervi emergence success*

187 The Petri dishes containing the collected mummies remained in the insectary for seven days to  
188 allow the parasitoids to emerge freely, in accordance with development times determined by Ives  
189 *et al.* (1999). The number of hatched mummies was then counted. Each mummy was examined



190 for an emergence hole, and the proportion hatched to unhatched represented parasitoid  
191 emergence success.

## 192 **Data Analysis**

193 R version 3.5.1 statistical software was used to conduct all statistical analyses (R Core Team,  
194 2018). Since aphid count data was not normally distributed, the natural log was taken and used  
195 throughout. All data were checked for normal distribution using a Shapiro-Wilk test. After this  
196 assumption was met, a Bartlett test was carried out on categorical data to ensure there was equal  
197 variance across all samples (homoscedasticity). All the data also met this assumption.

198 A Mixed Effects Model was used to examine the relationship between days and number of  
199 aphids. Days were included as a random effect because they were not independent of one  
200 another, with days closer to each other being more likely to be interrelated than ones further  
201 apart. It was assumed that data collected from plants within a chamber may be correlated,  
202 therefore, plants were nested within chambers and included as an additional random effect. This  
203 allowed for an increased sample size and prevented the need to aggregate data through  
204 averaging.

205 The natural log of aphid counts were averaged for each chamber for each day measurements  
206 were taken. A single-factor analysis of variance (ANOVA) assessed whether there was a  
207 significant difference between the kdr-SS and kdr-SR aphid counts performed on each day. A  
208 single-factor ANOVA was also used to determine differences between genotypes for MRGR,  
209 proportion of mummified aphids and emergence success. The interaction data was normally  
210 distributed count data. Therefore, a generalised linear model with Poisson distribution was used  
211 to assess the effect of genotype.

212 Graphs were made using Microsoft Excel 2016 or SigmaPlot 13.0. When constructing Figure 1,  
213 raw data were used rather than logged values. This showed variation and error more clearly.

## 214 **Results**

### 215 *Tiller-level aphid abundance*

216 Figure 1 shows that the kdr-SS clone had greater tiller-level abundance throughout the  
217 experiment than the kdr-SR clone. From day 7 onwards this was statistically significantly  
218 different. The kdr-SR clone increased, on average, by 3.2 aphids per day, whereas the kdr-SS  
219 clone increased by an average of 4.4 aphids per day. The significant difference in abundance  
220 between clones continued until day 28, by which point the kdr-SS abundance had reached a  
221 plateau of approximately  $119 \pm 2$  individuals. The kdr-SR population was still increasing at the  
222 end of the 31 day period.

### 223 *Mean Relative Growth Rate*

224 Figure 2 illustrates that the Mean Relative Growth Rate (MRGR) of individual kdr-SR aphids  
225 was significantly lower than that of individual kdr-SS clone ( $F_{1,14} = 4.8$ ,  $p < 0.0466$ ). Sample size  
226 varied between genotype due to aphid damage or mortality.

### 227 *Parasitoid-aphid interaction*

228 Figure 3a illustrates that there was no difference in the mean number of ‘warding behaviours’  
229 between the kdr-SR and kdr-SS clones when attacked by a wasp. (GLM -  $z$ -value = 0.29,  $df = 39$ ,  
230  $p < 0.77$ ). The mean number of kicks per minute was  $10.5 \pm 0.5$  for both genotypes.

### 231 *Mummification rate*

232 Figure 3b illustrates the reduced proportion of mummified aphids of the kdr-SS clone compared  
233 with the kdr-SR aphids ( $F_{1,6} = 6.04$ ,  $P < 0.049$ ). The proportion of mummified kdr-SR aphids  
234 was 35% greater than that of the kdr-SS clone.

### 235 *Aphidius ervi emergence success*

236 Figure 3c illustrates that there was an decreased emergence rate of *kdr*-SR parasitoids from aphid  
237 mummies in comparison with the *kdr*-SS clones, but that this was not significantly different ( $F_{1,6}$   
238 = 0.9,  $P < 0.38$ ).

## 239 Discussion

240 Throughout the course of the experiment, the pyrethroid resistant *kdr*-SR clone had a  
241 significantly lower tiller-level abundance than the pyrethroid susceptible *kdr*-SS clone. This may  
242 have been a consequence of the significantly reduced MRGR of the *kdr*-SR clone individuals  
243 compared with the *kdr*-SS clone. Reproductive rate is positively correlated with aphid size  
244 (Watt, 1979; Dixon and Dharma, 1980) and evidence shows that larger *Sitobion avenae*  
245 individuals have greater fecundity than smaller ones (Wratten, 1977). The lower population  
246 growth rate of the *kdr*-SR clone compared with the *kdr*-SS clone suggests either that the *kdr*-SR  
247 clones are less fecund than their counterparts and/or that they have increased mortality. Dixon  
248 (1970) demonstrated that smaller sycamore aphids (*Drepanosiphum platanooides*) have higher  
249 rates of mortality and that they are more likely to die before reproducing. A further possibility to  
250 explain the reduced *kdr*-SR abundance is therefore that they took longer to reproduce. Dixon  
251 and Wratten (1971) showed that smaller aphids take longer to produce their progeny. In their  
252 study, by the tenth day of adult life, large apterous aphids had produced approximately 60% of  
253 their offspring, whereas small apterous aphids had only produced 44%. The lower MRGR of the  
254 *kdr*-SR individuals may therefore have led to the increased time needed to produce all their  
255 progeny. This is supported by the observation that the *kdr*-SS population plateaued during the  
256 last week of the experiment, whereas the *kdr*-SR population was still increasing at the last count.

257 In addition to the slower population growth rate and reduced MRGR, the *kdr*-SR clone was also  
258 significantly more susceptible to parasitisation than the insecticide susceptible *kdr*-SS clone  
259 (31% vs 22% mummification rate, respectively). This is in agreement with Foster *et al.* (2007)  
260 who showed that insecticide resistant peach potato aphids (*Myzus persicae*) also had a greater

261 rate of mummification compared with their insecticide susceptible counterparts. Foster *et al.*  
262 (2007) further went on to show that this was associated with reduced warding behaviour in the  
263 insecticide resistant clones. This study however failed demonstrate a difference in the ability of  
264 the two clones to exhibit behaviours intended to repel parasitoid attack. Upon first contact with  
265 the parasitoid both clones exhibited kicking or dropping behaviour approximately 10 times per  
266 minute. The explanation for the increased mummification rate of the kdr-SR clone therefore  
267 cannot lie with reduced warding behaviour and may possibly be due to reduced effectiveness of  
268 warding behaviour by the smaller kdr-SR clones.

269 Contrary to expectations there was no significant difference in parasitoid emergence success.

270 The suitability of a host has been shown to affect parasitoid development (Harvey *et al.* 2014)

271 and smaller hosts are less likely to provide the nutritional quality needed for parasitoids to

272 develop and emerge (Desneux *et al.* 2009). *A. ervi* larvae require an intricate combination of

273 endosymbionts and teratocytes provided by the host in order to grow exponentially within a

274 mummy. Suboptimal teratocytes and endosymbionts provided by smaller hosts can drastically

275 impair the physiology of parasitoid larvae (Pennacchio *et al.* 1999). The explanation for the

276 unexpected lack of difference may lie with the relatively benign conditions found within the

277 controlled environment, although this remains to be tested in a field situation.

278 The sudden appearance of the kdr mechanism in this SA3 *Sitobion avenae* clone appears to be a

279 case of ‘forced evolution’, in which the development of the insecticide-resistant gene has led to

280 numerous inhibitory, pleiotropic costs. Adaptations that evolve over a long period of time are

281 likely to be more successful than rapid forced evolution and may not appear with these

282 significant trade-offs. It may be that the fitness trade-offs acting against pesticide resistance have

283 been intensified (McKenzie, 1996) due to the rapid kdr-mutation. As the kdr-SR aphids

284 performed significantly less well than the kdr-SS clone in three of the five behavioural and

285 physiological performance traits measured in this experiment, it is likely that this is the case.

286 This study suggests there is further potential to incorporate parasitoids into pest management  
287 schemes. The increased rate of mummification has shown that parasitoids can exploit trade-offs  
288 in the insecticide resistant *Sitobion avenae* clone which could possibly act to combat insecticide  
289 resistance. If the SA3 lineage acquires the ability to reproduce sexually, perhaps producing a  
290 kdr-RR genotype, it may exhibit an even greater level of immunological resistance. Should this  
291 be the case a strategy will be required to minimise the spread of this genotype and parasitoids  
292 would play a crucial part in this. Numerous studies have documented the success of parasitoids  
293 as components in agroecosystems (Stary, 1987). The alteration of cropping systems to favour  
294 natural enemies is often referred to as habitat modification and can operate at the plant, farm or  
295 landscape level (Gurr *et al.* 2004). It consists of diversifying crop ecosystems to make the  
296 environment more suitable for beneficial species. The addition of plant species that supply a  
297 resource, such as nectar or shelter, in an agro-ecosystem environment, has been proven to  
298 increase fecundity and longevity of parasitoids (Baggen and Gurr, 1998; Irvin *et al.* 2006). By  
299 making the environment more suitable to parasitoids, there is potential to reduce yield loss both  
300 directly and indirectly through the spread of aphid transmitted crop disease.

301 Furthermore, parasitoid behaviour can also be manipulated in order to maximise pest  
302 management. Ostensibly, the greatest difficulty in using parasitoids for biological control is  
303 synchronising the emergence of parasitoids with the beginning of aphid colonisation. If  
304 parasitoid emergence is not synchronous with aphid infestation, then aphid numbers become too  
305 large (Powell and Pickett, 2003). Parasitoids can be manipulated using aphid pheromones.  
306 Synthetic aphid sex pheromones have been shown to attract parasitoids (Powell *et al.* 1993) and  
307 exploring the potential of using such pheromones to manipulate female parasitoids with the aim  
308 of creating overwintering reservoirs in field margins, would be a valuable area of future research.  
309 This would allow parasitoids to swiftly recolonise crops in anticipation of aphid arrival in spring.  
310 In addition, plant volatiles, which are emitted when herbivorous arthropods feed on a plant, can  
311 be used by parasitoids as host location cues (Steinberg *et al.* 1993; Takabayashi *et al.* 1994). By

312 producing crop varieties that release plant volatiles faster and in greater quantities, *A. ervi* would  
313 be able to locate aphids earlier (Powell and Pickett, 2003). In a field study Simpson *et al.* (2011)  
314 found that providing a combination of synthetic herbivore-induced plant volatiles and nectar  
315 plants improved the recruitment and residency of parasitoids and other beneficial arthropods.

316 Although there are many options available for using parasitoids as a biological control, the  
317 extensive use of pesticides will hamper such efforts in the future. Exposure to sub-lethal doses of  
318 the pyrethroid insecticide, lambda-cyhalothrin, have been proven to directly affect the ability of  
319 *A. ervi* to locate and oviposit on a host (Desneux *et al.* 2004). Furthermore, while the mummified  
320 shell can protect parasitoids from the effects of some insecticides throughout late larval, prepupal  
321 and pupal stages (Borgemeister *et al.* 1993; Jansen, 1996), other pesticides remain able to  
322 penetrate the mummified shell, subsequently killing the developing parasitoid (Hsieh and Allen,  
323 1986; Krespi *et al.* 1991). A laboratory experiment conducted by Purcell and Granett (1985)  
324 found that the parasitoid *Trioxys pallidus* had a decreased emergence rate of 97% when sprayed  
325 with the organophosphate pesticide, azinphos-methyl. The authors found that 50% died within a  
326 day of emerging successfully, 39% died from ingesting toxic residue when cutting an emergence  
327 hole and 8% died within the mummy. Such studies put into question the effectiveness of  
328 parasitoids as a biological control when administered alongside pesticides.

329 However, numerous field studies have concluded that the effects of pesticides on parasitoids are  
330 significantly lower in comparison to laboratory bioassays (Orbtel, 1961; White *et al.* 1990).  
331 When compared to mummies sprayed with pesticide in a laboratory, mummies collected from  
332 crops in the field had a significantly lower mortality rate (Orbtel, 1961). The author provided two  
333 possible explanations for this variation. Firstly, pesticide residues sprayed in the field are more  
334 likely to experience weathering effects, such as photodecomposition, at a greater rate than  
335 laboratory conditions. These effects make them less toxic to emerging parasitoids. Secondly,  
336 mummies in the field receive less spray deposition than those in a concentrated laboratory  
337 environment. Therefore, various studies have described laboratory experiments as being a

338 ‘worst-case scenario’ and highly unlikely to be representative of natural conditions (Longley,  
339 1999).

340

341 **References**

342 AHDB (Agriculture and Horticulture Development Board) (2019) AHDB Recommended Lists  
343 for cereals and oilseeds 2019/20. AHDB Cereals & Oilseeds. Stoneleigh Park, Warwickshire.

344 Austin, R.B. (1998) *Yield of wheat in the UK: recent advances and prospects*. In: Annual  
345 Meeting of the Crop Science Society of America.

346 Baggen, L.R., Gurr, G.M. (1998) The influence of food on *Copidosoma koehleri* (Hymenoptera:  
347 Encyrtidae) and the use of flowering plants as a habitat management tool to enhance biological  
348 control of potato moth. *Phthorimaea operculella* (Lepidoptera: Gelechiidae). *Biological Control*  
349 **11**: 9-17.

350 Boivin, T., Bouvier, J.C., Chadoeuf, J., Beslay, G., Sauphanor, B. (2003) Constraints on adaptive  
351 mutations in the codling moth *Cydia pomonella* (L.): measuring fitness trade-offs and natural  
352 selection. *Heredity* **90**: 107-113.

353 Borgemeister, C., Poehling, H-M., Dinter, A., Holler, C. (1993) Effects of insecticides on life  
354 history parameters of the aphid parasitoid *Aphidius rhopalosiphi* (Hym: Aphidiidae).  
355 *Entomophaga* **38**: 245-255.

356 Chambers, R.J., Sunderland, K.D., Stacey, D.L., Wyatt, I.J. (1986) Control of cereal aphids in  
357 winter wheat by natural enemies: aphid-specific predators, parasitoids and pathogenic fungi.  
358 *Annals of Applied Biology* **108**: 219-231.

359 Crow, J.F. (1957) Genetics of insect resistant chemicals. *Annual Review of Entomology* **45**: 997-  
360 1001.

361 Dean, G.J., Luuring, B.B. (1970) Distribution of aphids in cereal crops. *Annals of Applied*  
362 *Biology* **66**: 485-496.

363 Debach, P., Rosen, D, (1991) *Biological control by natural enemies*. Cambridge University  
364 Press, New York, New York, USA.



- 365 Desneux, N., Pham-Delégue, M., Kaiser, L. (2004) Effects of sub-lethal and lethal doses of  
366 lambda-cyhalothrin on oviposition experience and host-searching behaviour of a parasitic wasp,  
367 *Aphidius ervi*. *Pest Management Science* **60**(4): 381-389.
- 368 Desneux, N., Barta, R.J., Hoelmer, K.A. (2009) Multifaceted determinants of host specificity in  
369 an aphid parasitoid. *Oecologia* **160**: 387-398.
- 370 Dixon, A.F.G. (1998) *Aphid Ecology*. London: Chapman & Hall.
- 371 Dixon, A.F.G., Dharma, T.R. (1980) “Spreading the risk” in developmental mortality: size,  
372 fecundity and reproductive rate in the black bean aphid. *Entomologia Experimentalis et*  
373 *Applicata* **28**: 301-312.
- 374 Dixon, A.F.G. (1970) Quality and availability of food for a sycamore aphid population. *In*  
375 Watson, A. *Ed. Animal populations in relation to their food sources* [British Ecological Society  
376 Symposium no. 10] 271-287. Oxford, Blackwell.
- 377 Dixon, A.F.G., Wratten, S.D. (1971) Laboratory studies on aggregation, size and fecundity in the  
378 black bean aphid, *Aphis fabae* Scop. *Bulletin of Entomological Research* **61**: 97-111.
- 379 Field, L.M., Williamson, M.S., Moores, G.D., Devonshire, A.L. (1993) Cloning and analysis of  
380 the esterase genes, conferring insecticide resistance in the peach-potato aphid *Myzus persicae*  
381 (Sulzer). *Biochemical Journal* **294**: 569-574.
- 382 Foster, S.P., Young, S., Williamson, M.S., Duce, I., Denholm, I., Devine, G.J. (2003) Analogous  
383 pleiotropic effects of insecticide resistance genotypes in peach-potato aphids and houseflies.  
384 *Heredity* **91**(2): 98-106.
- 385 Foster, S.P., Paul, V.L., Slater, R., Warren, A., Denholm, I., Field, L., Williamson, M.S. (2014)  
386 A mutation (L1014F) in the voltage-gated sodium channel of the grain aphid, *Sitobion avenae*,  
387 associated with resistance to pyrethroid insecticides. *Pest Management Science* **70**: 1249-1253.

- 388 Foster, S.P., Tomiczek, M., Thompson, R., Denholm, I., Poppy, G., Kraaijeveld, A.R., Powell,  
389 W. (2007) Behavioural side-effects of insecticide resistance in aphids increase their vulnerability  
390 to parasitoid attack. *Animal Behaviour* **74**: 621-632.
- 391 Godfray, H.C.J. (1994) *Parasitoids: Behavioural and Evolutionary Ecology*. Princeton, New  
392 Jersey: Princeton University Press.
- 393 Gurr, G.M., Wratten, S.D., Altieri, M.A. (2004) *Ecological Engineering: Advances in Habitat*  
394 *Manipulation for Arthropods*. CSIRO Publishing, Melbourne, Victoria, Australia.
- 395 Harvey, J.A., Molina, A.C., Bezemer, T.M., Malcicka, M. (2014) Convergent development of a  
396 parasitoid wasp on three host species with differing mass and growth potential. *Entomologia*  
397 *Experimentalis et Applicata* **154**(1): 15-22.
- 398 Hseih, C.Y., Allen, W.W. (1986) Effects of insecticides on emergence, survival, longevity, and  
399 fecundity of the parasitoid *Diaeretiella rapae* (Hymenoptera: Aphidiidae) from mummified  
400 *Myzus persicae* (Homoptera: Aphidiidae). *Journal of Economic Entomology* **79**: 1599-1602.
- 401 Huffaker, C.B. (2012) *Theory and practice of biological control*. Elsevier.
- 402 Hunter, S.J. (1909) The green bug and its natural enemies. *Kansas State University Bulletin* **9**: 1-  
403 163.
- 404 Irvin, N.A., Scarratt, S.L., Wratten, S.D., Frampton, C.M., Chapman, R.B., Tylianakis, J.M.  
405 (2006) The effects of floral understoreys on parasitism of leafrollers (Lepidoptera: Tortricidae)  
406 on apples in New Zealand. *Agricultural and Forest Entomology* **8**: 25-34.
- 407 Ives, A.R., Schooler, S.S., Jagar, V.T., Knuteson, S.E., Grbic, M., Settle, W.H. (1999)  
408 Variability and parasitoids foraging efficiency: a case study of pea aphids and *Aphidius ervi*. *The*  
409 *American Naturalist* **154**(6): 652-673.

- 410 Jackson, G.E. (1995) The effects of ozone, nitrogen dioxide or nitric oxide fumigation of cereals  
411 on the rose grain aphid *Metopolophium dirhodum*. *Agriculture, Ecosystems and Environment* **54**:  
412 187-194.
- 413 Jansen, J.P. (1996) Side effects of insecticides on *Aphidius rhopalosiphi* (Hym: Aphidiidae) in  
414 laboratory *Entomophaga* **41**: 37-43.
- 415 Krespi, L., Rabasse, J.M., Dedryver, C.A., Nenon, J.P. (1991) Effect of three insecticides on the  
416 life-cycle of *Aphidius uzbekistanicus* Luz. (Hym: Aphidiidae). *Journal of Applied Entomology*  
417 **111**: 113-119.
- 418 Longley, M. (1999) A review of pesticide effects upon immature aphid parasitoids within  
419 mummified hosts. *International Journal of Pest Management* **45**(2): 139-145.
- 420 Malloch, G., Williamson, M., Foster, S. (2016) Monitoring pyrethroid resistance (kdr) and  
421 genetic diversity in UK populations of the grain aphid *Sitobion avenae* during 2015. AHDB -  
422 Potatoes, Agriculture and Horticulture Development Board project ref R114R480.
- 423 Malloch, G., Hight F., Kasprowicz L., Pickup J., Neilson R., Fenton B. (2006) Microsatellite  
424 marker analysis of peach-potato aphids (*Myzus persicae*, Homoptera: Aphididae) from Scottish  
425 suction traps *Bulletin of Entomological Research* (2006) **96**: 573-582.
- 426 McKenzie, J.A. (1996) *Ecological and Evolutionary Aspects of Insecticide Resistance*. Austin,  
427 Texas: R. G. Landes Co.
- 428 Noble M.D. (1958) A simplified clip cage for aphid investigations. *Canadian*  
429 *Entomologist*. **90**: 760-760.
- 430 Orbtel, R. (1961) Effects of two insecticides on *Aphidius ervi* Hal. (Hym: Braconidae), an  
431 internal parasite of *Acyrtosiphon onobrychis* (Boyer). *Zoology Listy* **24**: 1-8.

- 432 Pennacchio, F., Fanti, P., Falabella, P., Digilio, M.C., Bisaccia, F., Tremblay, E. (1999)  
433 Development and nutrition of the braconid wasp, *Aphidius ervi* in aposymbiotic host aphids.  
434 *Archives of Insect Biochemistry and Physiology* **40**: 53-63.
- 435 Powell, W., Pickett, J.A. (2003) Manipulation of parasitoids for aphid pest management:  
436 progress and prospects. *Pest Management Science* **59**: 149-155.
- 437 Powell, W., Hardie, J., Hick, A.J., Holler, C., Mann, J., Merritt, L., Nottingham, S.F., Wadhams,  
438 L.J., Witthinrich, J., Wright, A.F. (1993) Responses of the parasitoids *Praon volucre*  
439 (Hymenoptera: Braconidae) to aphid sex pheromone lures in cereal fields in autumn:  
440 Implications for parasitoid manipulation. *European Journal of Entomology* **90**: 435-438.
- 441 Purcell, M., Granett, J. (1985) Toxicity of benzoylphenyl ureas and thuringiensin to *Trioxys*  
442 *pallidus* (Hymenoptera: Braconidae) and the walnut aphid (Homoptera: Aphidiidae). *Journal of*  
443 *Economic Entomology* **78**: 1133-1137.
- 444 *R Core Team* (2018) *R: A language and environment for statistical computing*. R Foundation for  
445 Statistical Computing, Vienna, Austria.
- 446 Room, P.M., Harley, K.L.S., Forno, I.W., Sands, D.P.A. (1981) Successful biological control of  
447 the floating weed *Salvinia*. *Nature* **294** (5836): 78.
- 448 Roush, R.T., McKenzie, J.A. (1987) Ecological genetics of insecticide and acaricide resistance.  
449 *Annual Review of Entomology* **32**: 361-380.
- 450 Sawicki, R.M. (1985) Resistance to pyrethroid insecticides in arthropods. *Progress in Pesticide*  
451 *Biochemistry and Toxicology* **5**: 143-192.
- 452 Simon, J.C., Baumann, S., Sunnucks, P., Hebert, P., Pierre, J.S., LeGallic, J.F., Dedryver, C.A.  
453 (1999) Reproductive mode and population genetic structure of the cereal aphid *Sitobion avenae*  
454 studied using phenotypic and microsatellite markers. *Molecular Ecology* **8**: 531-545.

- 455 Simpson, M., Gurr, G.M., Simmons, A.T., Wratten, S.D., James, D.G., Leeson, G., Nicol, H.I.,  
456 Orre-Gordon, G.U.S. (2011) Attract and reward: combining chemical ecology and habitat  
457 manipulation to enhance biological control in field crops. *Journal of Applied Ecology* **48**: 580-  
458 590.
- 459 Sloane, M.A., Sunnucks, P., Wilson, A.C., Hales, D.F. (2001) Microsatellite isolation, linkage  
460 group identification and determination of recombination frequency in the peach-potato aphid,  
461 *Myzus persicae* (Sulzer)(Hemiptera: Aphididae). *Genetics Research* **77**: 251-260.
- 462 Starý, P. (1987) Subject bibliography of aphid parasitoids (Hymenoptera: Aphidiidae) of the  
463 world 1758 – 1982. *Monographs to Applied Entomology* **25**: 101.
- 464 Starý, P. (1988) *Natural Enemies*. Pages 171-184. Elsevier, Amsterdam.
- 465 Starý, P., Lyon, J.P., Leclant, F. (1988) Biocontrol of aphids by the introduced *Lysiphlebus*  
466 *testaceipes* (Cress.) (Hym. Aphidiidae) in Mediterranean France. *Journal of Applied Entomology*  
467 **105**: 74-87.
- 468 Steinberg, S., Dicke, M., Vet, L.E.M. (1993) Relative importance of infochemicals from first and  
469 second trophic level in long-range host location by the larval parasitoid *Cotesia glomerata*.  
470 *Journal of Chemical Ecology* **19**: 47-59.
- 471 Takabayashi, J., Dicke, M., Takahashi, S., Posthumus, M.A., van Beek, T.A. (1994) Leaf age  
472 affects composition of herbivore-induced synomones and attraction of predatory mites. *Journal*  
473 *of Chemical Ecology* **20**: 373-386.
- 474 Thiboldeaux, R. (1986) The effect of temperature on population level interactions between the  
475 pea aphid, *Acyrtosiphon pisum*, and its primary parasitoids, *Aphidius ervi*. *M.S. thesis*.  
476 University of Wisconsin – Madison.

- 477 Van Emden, H.F., Bashford, M.A. (1969) A comparison of the reproduction of *Brevicoryne*  
478 *brassicae* and *Myzus persicae* in relation to soluble nitrogen concentration and leaf age (leaf  
479 position) in the brussels sprout plant. *Entomologia Experimentalis et Applicata* **12**: 351-364.
- 480 Van Emden, H.F., Harrington, R. (2017) *Aphids as Crop Pests*. Centre for Agriculture and  
481 Biosciences International, Wallington, England.
- 482 Villagra, C.A., Ramírez, C.C., Niemeyer, H.M. (2002) Antipredator responses of aphids to  
483 parasitoids change as a function of aphid physiological state. *Animal Behaviour* **64**: 677-683.
- 484 Watt, A.D. (1979) The effect of cereal growth stages on the growth and reproductive activity of  
485 *S. avenae* and *M. dirhodum*. *Annals of Applied Biology* **91**: 147-157.
- 486 White, J.S., Everett, C.J., Brown, R.A. (1990) Lambda-cyhalothrin: laboratory and field methods  
487 to assess the effects on natural enemies. In *British Crop Protection Conference – Pests and*  
488 *Diseases – 1990* (Farnham, Surrey, UK: BCPC Publications), pp. 969-974.
- 489 Wilson, A.C., Massonnet, B., Simon, J.C., Prunier-Leterme, N., Dolatti, L., Llewellyn, K. S.,  
490 Figueroa, C. C., Ramirez, C.C., Blackman, R. L., Estoup, A. (2004) Cross-species amplification  
491 of microsatellite loci in aphids: assessment and application. *Molecular Ecology Resources* **4**:  
492 104-109.
- 493 Wratten, S.D. (1977) Reproductive strategy of winged and wingless morphs of the aphids  
494 *Sitobion avenae* and *Metapolophium dirhodum*. *Annals of Applied Biology* **85**: 319-331.
- 495
- 496

497 **Figures**

498

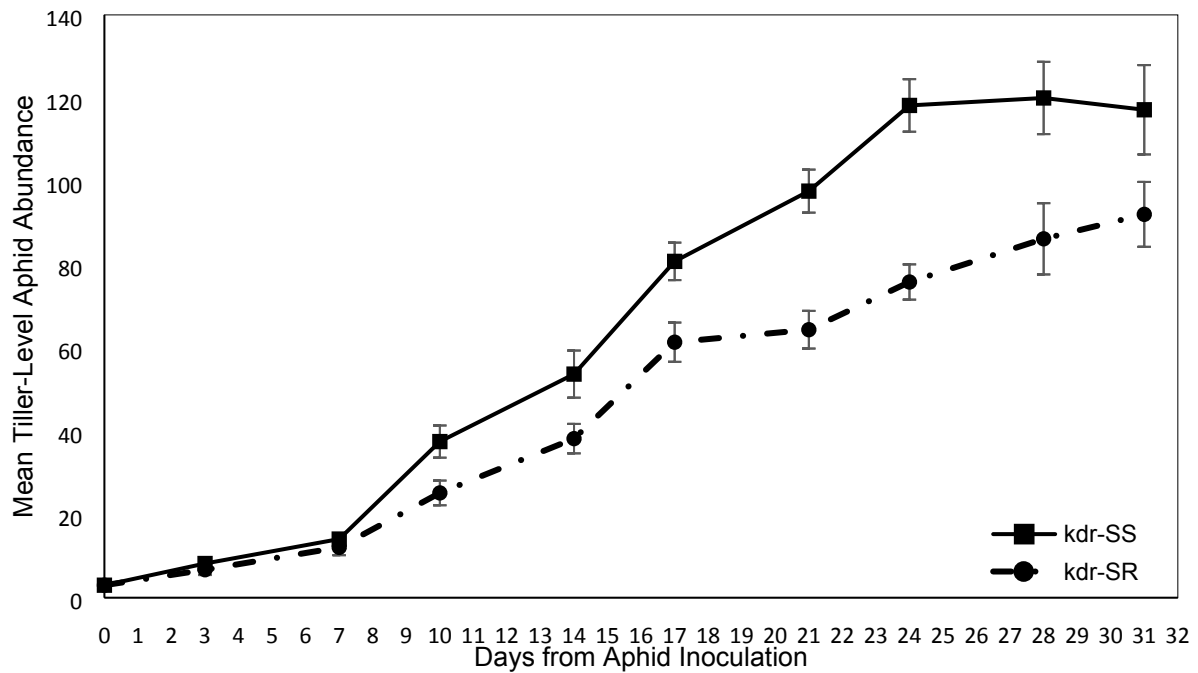

499

500 **Figure 1:** Mean tiller-level aphid abundance over time. Error bars represent  $\pm$  SE for each  
501 category for each day of measurement. (n = 24)

502

503

504

505

506

507

508

509

510

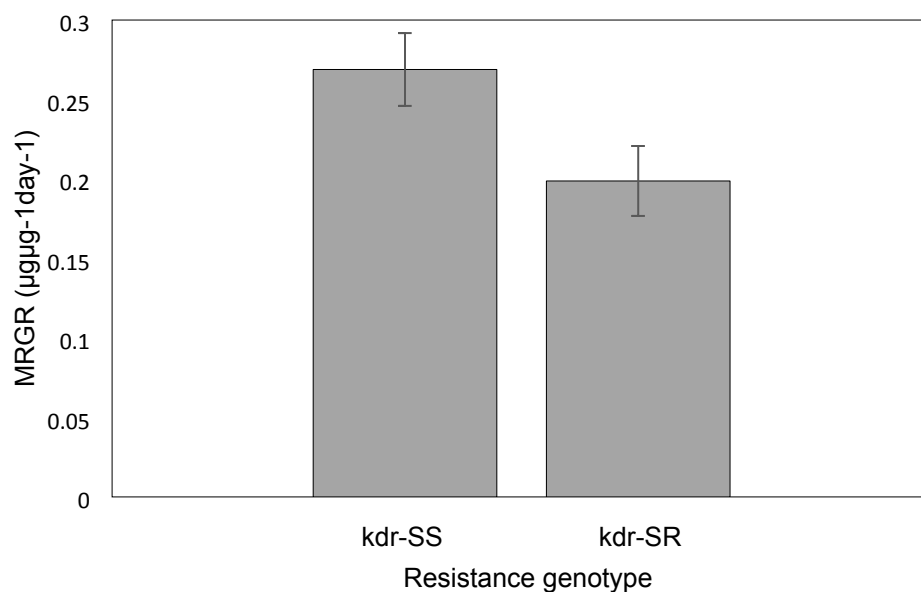

23

511

512

513

514

515

516

517

518

519

520 **Figure 2.** Mean Relative Growth Rate (MRGR) of the kdr-SS and kdr-SR clones. Error bars  
521 represent  $\pm$  individual SE for each category. Aphids that were damaged were not included in the  
522 analysis. (kdr-SS  $n = 7$ , kdr-SR  $n = 9$ ).

523



524

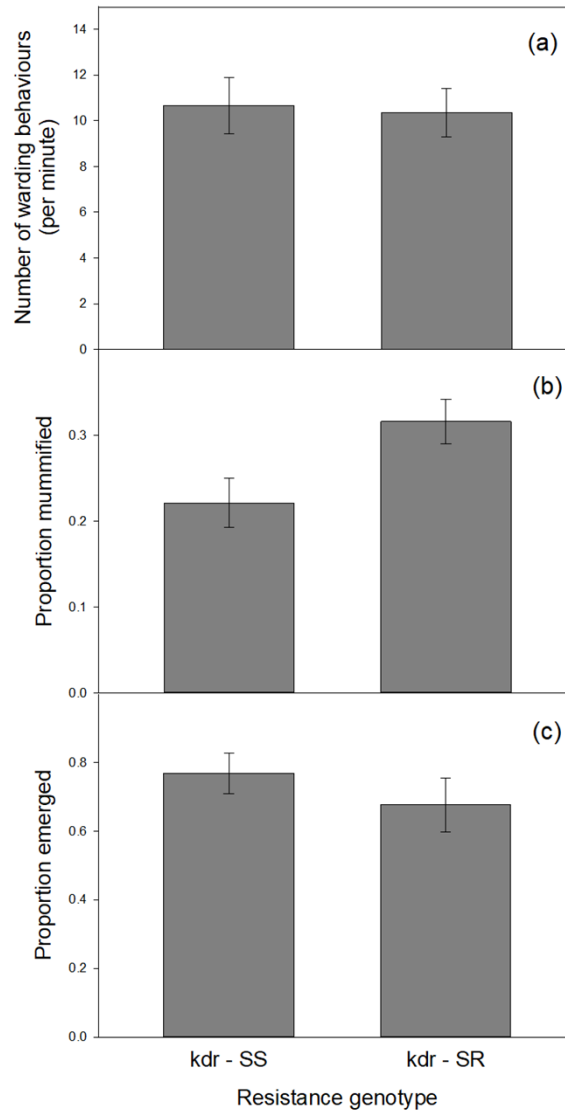

525

526 **Figure 3.** (a) Mean number of kicks/drops per minute carried out by the kdr-SR and kdr-SS  
527 clones when attacked by the parasitic wasp, *Aphidius ervi*. (b) The mean proportion of aphids  
528 mummified for both genotypes. (c) The mean proportion of wasps that successfully emerged  
529 from aphid mummies for both genotypes. Error bars represent  $\pm$  individual SE for each category.

530

531
